# Supplementary material for: Metasecretome analysis of a lignocellulolytic microbial consortium grown on wheat straw, xylan and xylose
Source: PubMed Central journal article supplement (PMC4666044; doi:10.1186/s13068-015-0387-8), 2015-12-01
Supplement: 13068_2015_387_MOESM1_ESM.pdf [file 13068_2015_387_MOESM1_ESM.pdf]

**A)**

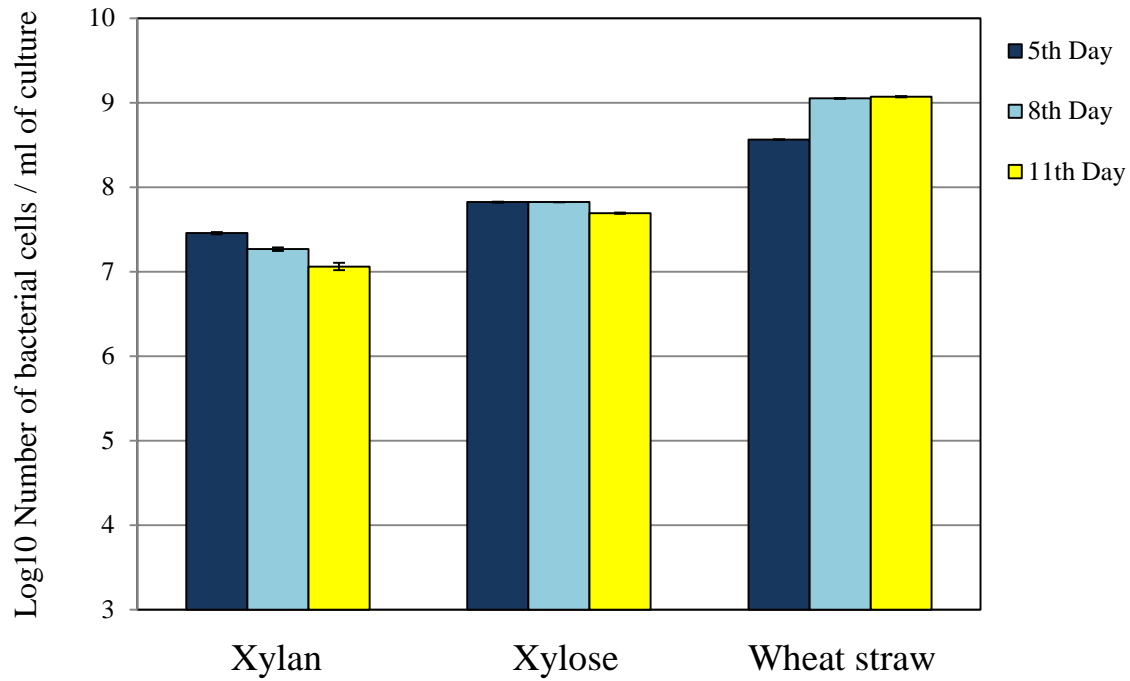

**B)**

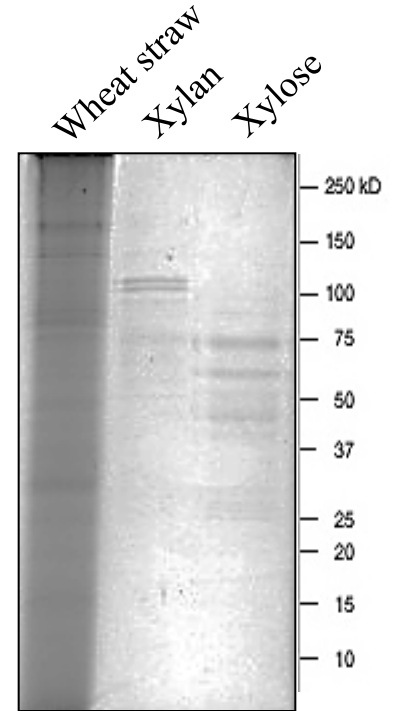

Additional file 1.
